# Supplementary material
Source: PubMed Central journal article supplement (PMC5222575)
Supplement: NIHMS735168-supplement-01.pdf [file NIHMS735168-supplement-01.pdf]

## Developmental Change in ADHD Network 32

## Supplemental Material

## Appendix A

## Network Indices of Centrality

|               | <u>Preschool</u> |        | <u>Childhood</u> |        | <u>Adolescence</u> |        | <u>Adulthood</u> |        |
|---------------|------------------|--------|------------------|--------|--------------------|--------|------------------|--------|
|               | Closeness        | Degree | Closeness        | Degree | Closeness          | Degree | Closeness        | Degree |
| Close attn.   | .051             | 7.49   | .057             | 8.87   | .058               | 8.91   | .059             | 6.14   |
| Sustain attn. | .062             | 10.47  | .062             | 10.05  | .061               | 9.72   | .066             | 7.54   |
| Listen        | .060             | 10.04  | .060             | 9.27   | .058               | 8.68   | .052             | 4.95   |
| Follow thru   | .062             | 10.56  | .060             | 9.77   | .059               | 9.39   | .057             | 5.87   |
| Organize      | .061             | 10.38  | .058             | 9.15   | .058               | 9.04   | .056             | 5.55   |
| Mental effort | .058             | 9.42   | .058             | 9.2    | .059               | 9.29   | .055             | 5.61   |
| Loses         | .058             | 9.19   | .057             | 8.83   | .059               | 9.3    | .053             | 5.15   |
| Distracted    | .064             | 11.15  | .062             | 10.2   | .063               | 10.23  | .066             | 7.53   |
| Forgetful     | .058             | 9.32   | .060             | 9.47   | .061               | 9.63   | .055             | 5.63   |
| Fidgets       | .061             | 10.11  | .059             | 8.97   | .057               | 8.29   | .061             | 6.61   |
| Leaves seat   | .058             | 9.45   | .059             | 8.77   | .058               | 8.41   | .061             | 6.6    |
| Runs, climbs  | .055             | 8.47   | .054             | 7.54   | .053               | 7.2    | .065             | 7.46   |
| Quiet         | .060             | 9.87   | .055             | 7.87   | .057               | 8.13   | .054             | 5.19   |
| On the go     | .057             | 9.16   | .056             | 8.11   | .054               | 7.47   | .055             | 5.63   |
| Talks         | .059             | 9.48   | .053             | 7.14   | .053               | 7.31   | .052             | 5.08   |
| Blurts        | .054             | 8.05   | .055             | 7.89   | .058               | 8.48   | .054             | 5.56   |
| Waiting       | .058             | 9.51   | .059             | 8.87   | .061               | 9.55   | .058             | 5.92   |
| Interrupts    | .058             | 9.61   | .059             | 8.96   | .059               | 8.82   | .058             | 6.16   |

*Note.* Closeness represents the distance between each single node and all other nodes; degree represents the strength of the relationship each node has with all other nodes. Higher numbers are more central to the network.

## Appendix B

## Visualization of Two-Cluster Inattention and Hyperactivity-Impulsivity Childhood Network Based on Teacher Report

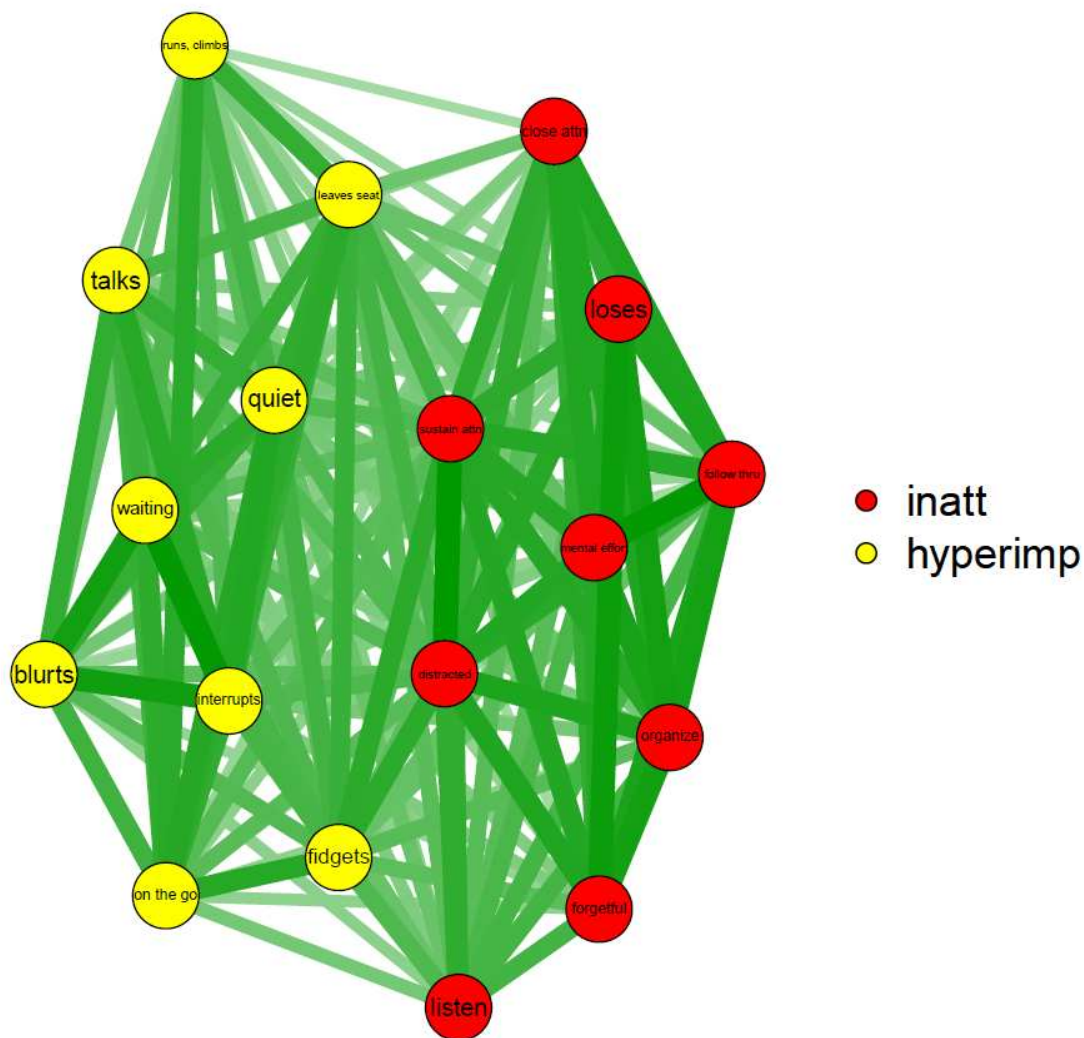

**Symptom Key.** Close attn=Often fails to give close attention to details or makes careless mistakes in schoolwork, at work, or during other activities. Sustain attn=Often has difficulty sustaining attention in tasks or play activities. Listen=Often does not seem to listen when spoken to directly. Follow thru=Often does not follow through on instructions and fails to finish schoolwork, chores, or duties in the workplace. Organize=Often has difficulty organizing tasks and activities. Mental effort=Often avoids, dislikes, or is reluctant to engage in tasks that require sustained mental effort. Loses=Often loses things necessary for tasks or activities. Distracted=Is often easily distracted by extraneous stimuli. Forgetful=Is often forgetful in daily activities. Fidgets=Often fidgets or raps hands or feet or squirms in seat. Leaves seat=Often leaves seat in situations when remaining seated is expected. Runs, climbs=Often runs about or climbs in situations where it is inappropriate. Quiet=Often unable to play or engage in leisure activities quietly. On the go=Is often “on the go,” acting as if “driven by a motor.” Talks=Often talks excessively. Blurts=Often blurts out an answer before a question has been completed. Waiting=Often has difficulty waiting his or her turn. Interrupts=Often interrupts or intrudes on others.

## Developmental Change in ADHD Network 34

## Appendix C

## Visualization of Three-Cluster Inattention, Hyperactivity, and Impulsivity Adult Network Based on Self Report

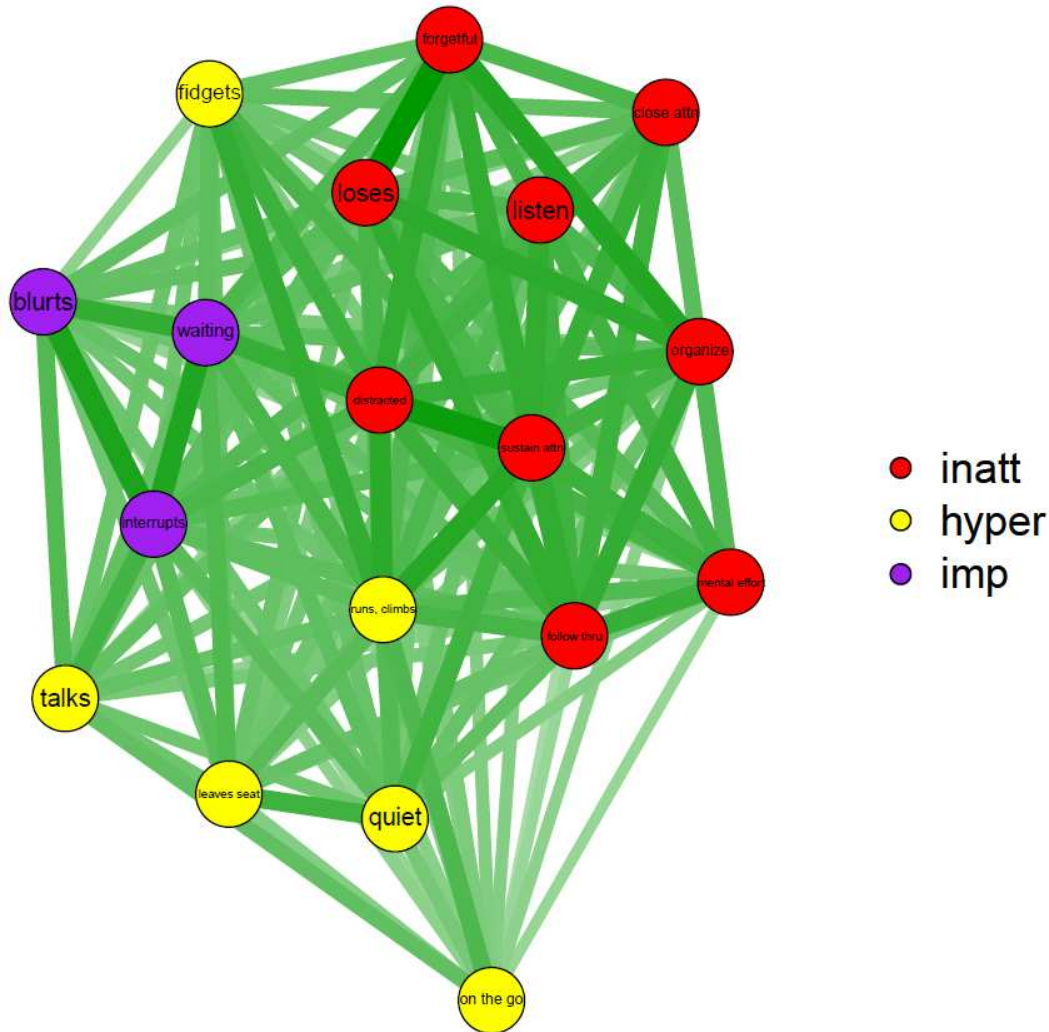

**Symptom Key.** Close attn=Often fails to give close attention to details or makes careless mistakes in schoolwork, at work, or during other activities. Sustain attn=Often has difficulty sustaining attention in tasks or play activities. Listen=Often does not seem to listen when spoken to directly. Follow thru=Often does not follow through on instructions and fails to finish schoolwork, chores, or duties in the workplace. Organize=Often has difficulty organizing tasks and activities. Mental effort=Often avoids, dislikes, or is reluctant to engage in tasks that require sustained mental effort. Loses=Often loses things necessary for tasks or activities. Distracted=Is often easily distracted by extraneous stimuli. Forgetful=Is often forgetful in daily activities. Fidgets=Often fidgets or raps hands or feet or squirms in seat. Leaves seat=Often leaves seat in situations when remaining seated is expected. Runs, climbs=Often runs about or climbs in situations where it is inappropriate. Quiet=Often unable to play or engage in leisure activities quietly. On the go=Is often “on the go,” acting as if “driven by a motor.” Talks=Often talks excessively. Blurts=Often blurts out an answer before a question has been completed. Waiting=Often has difficulty waiting his or her turn. Interrupts=Often interrupts or intrudes on others.
